# Supplementary material
Source: MDPI journal article supplement (https://www.mdpi.com/search?q=publications-07-00024)
Supplement: s001 [file publications-07-00024-s001.pdf]

Jeong Yeol Park

<http://orcid.org/0000-0003-2475-7123>

Yun Hwan Kim

<http://orcid.org/0000-0001-9498-2938>

Yong Jung Song

<http://orcid.org/0000-0002-6103-2466>

Hyun Hoon Chung

<http://orcid.org/0000-0002-5158-7492>

Sunghoon Kim

<http://orcid.org/0000-0002-1645-7473>

Jeong-won Lee

<http://orcid.org/0000-0002-6945-0398>

Jae-Weon Kim

<http://orcid.org/0000-0003-1835-9436>

Jong-Min Lee

<http://orcid.org/0000-0002-0562-5443>**Funding**

All costs related to the consensus conference were covered from the Korean Society of Gynecologic Oncology central funds. There was no external funding of the event or manuscript production.

**Conflict of Interest**

Jae-Weon Kim, Myong Cheol Lim, Jeong-Yeol Park, and Seung-Hyuk Shim serve as editors of the Journal of Gynecologic Oncology (JGO), but have no role in the decision to publish this article. No other conflict of interest relevant to this article was reported.

**Author Contributions**

Conceptualization: L.M.C., L.M., S.S.H., N.E.J., L.J.Y., K.H.J., L.Y.Y., L.K.B., P.J.Y., K.Y.H., K.K.D., S.Y.J., C.H.H., K.S., L.J.W., K.J.W., B.D.S., L.J.M.; Data curation: L.M.C., L.M., S.S.H., N.E.J., L.J.Y., K.H.J., L.Y.Y., L.K.B., P.J.Y., K.Y.H., K.K.D., S.Y.J., C.H.H., K.S., L.J.W., K.J.W., B.D.S., L.J.M.; Formal analysis: L.M.C., L.M., S.S.H., N.E.J., L.J.Y., K.H.J., L.Y.Y., L.K.B., P.J.Y., K.Y.H., K.K.D., S.Y.J., C.H.H., K.S., L.J.W., K.J.W., B.D.S., L.J.M.; Funding acquisition: L.J.W., K.J.W., B.D.S., L.J.M.; Investigation: L.M.C., L.M., S.S.H., N.E.J., L.J.Y., K.H.J., L.Y.Y., L.K.B., P.J.Y., K.Y.H., K.K.D., S.Y.J., C.H.H., K.S., L.J.W., K.J.W., B.D.S., L.J.M.; Methodology: L.M.C., L.M., S.S.H., N.E.J., L.J.Y., K.H.J., L.Y.Y., L.K.B., P.J.Y., K.Y.H., K.K.D., S.Y.J., C.H.H., K.S., L.J.W., K.J.W., B.D.S., L.J.M.; Project administration: L.J.W., K.J.W., B.D.S., L.J.M.; Resources: L.M.C., L.M., S.S.H., N.E.J., L.J.Y., K.H.J., L.Y.Y., L.K.B., P.J.Y., K.Y.H., K.K.D., S.Y.J., C.H.H., K.S., L.J.W., K.J.W., B.D.S., L.J.M.; Software: K.H.J.; Supervision: L.J.W., K.J.W., B.D.S., L.J.M.; Validation: L.M.C., L.M., S.S.H., N.E.J., L.J.Y., K.H.J., L.Y.Y., L.K.B., P.J.Y., K.Y.H., K.K.D., S.Y.J., C.H.H., K.S., L.J.W., K.J.W., B.D.S., L.J.M.; Visualization: K.H.J.;

**INTRODUCTION**

In 2012, cervical cancer was ranked the fourth in incidence and mortality among female cancers worldwide. Globally, cervical cancer had an estimated 528,000 new cases and was responsible for 266,000 deaths in 2012 [1]. Recently, the decreased incidence and mortality rates in developed countries have been attributed to the effectiveness of the screening test for cervical cancer. However, the incidence rate remains high in developing countries, where it accounts for 85% of all cervical cancer cases [2].

According to the Korea Central Cancer Registry data, there were 224,177 new cases of cancer in Korea in the year 2012. After excluding carcinoma in situ cases, cervical cancer was diagnosed in 3,584 cases, which comprised 1.7% of total cancer incidence, and ranking cervical cancer as the seventh most common cancer among females [3].

Although the incidence rate of cervical cancer shows a gradually decreasing trend, the incidence increased from 1993 through 2002 in women in their 20s and in those who were 70 years or older. As the incidence of cervical cancer decreased, an increase in the incidence of cervical cancer with carcinoma in situ was observed in all ages (20–80 years) [4]. This is due to early diagnosis and treatment at a precancerous stage rather than a decrease in de facto incidence of cervical cancer [2,5].

The most important risk factor for cervical cancer is the persistent high-risk human papillomavirus (HPV) infection. The rate of chronic HPV infection is approximately 10%–20% in countries with a high occurrence of cervical cancer and approximately 5%–10% [6] in countries with the low occurrence of cervical cancer. In Korea, the infection rate is reported to be approximately 10%–15%, although different results have been reported [7–10].

The test for HPV, which is a recognized cause of cervical cancer, has been recently included in the screening for cervical cancer. Additionally, the bivalent and quadrivalent HPV vaccines are being administered clinically. With effective treatments like surgery or concurrent chemoradiation therapy (CCRT), the cure rate of cervical cancer is up to 80%–90% in the early stages (stages I–II), and 60% in stage III. However, the prognosis is still poor with cancer progression to an advanced stage or recurrence.

The present guidelines are based on “The Practice Guidelines for Gynecological Cancers V2” (2010) and recent changes have been added. Key questions from clinical situation were put to thorough discussion with experts in such diverse fields as oncology, pathology, radiation oncology, radiology, and nuclear medicine. We also added an appendix with the evidence tables and the levels of evidence/recommendation.

The present practice guidelines for cervical cancer used the pathological classification (Table 1, modified World Health Organization [WHO] classification) recommended by the Gynecological Pathology Study Group of the Korean Society of Pathologist (GPSGKSP). There are 2 classification systems available for cervical cancer staging, the tumor, node, and metastasis (TNM) and International Federation of Gynecology and Obstetrics (FIGO) classification systems. The guidelines that used the FIGO staging were revised in early 2009 (Table 2).

The objective of these practice guidelines is to establish standard policies on issues in clinical practice related to the management in cervical cancer based on the results in published

**Corresponding author:** Karen Shashok ([kshashok@kshashok.com](mailto:kshashok@kshashok.com))

**Author roles:** **Matarese V:** Conceptualization, Investigation, Methodology, Resources, Visualization, Writing – Original Draft Preparation, Writing – Review & Editing; **Shashok K:** Conceptualization, Investigation, Methodology, Resources, Visualization, Writing – Original Draft Preparation, Writing – Review & Editing

**Competing interests:** VM and KS are both self-employed authors' editors and realize that this article might attract clients. VM is the author of the book *Editing Research* and realizes that this article might affect sales. VM and KS are both long-time members of Mediterranean Editors and Translators, and have been unpaid speakers at CPD events run by this organization. KS was Vice Chair of Mediterranean Editors and Translators during 2006. KS is a long-time member of Asetrad and was an unpaid speaker at a CPD event run by this organization in 2017.

**Grant information:** The author(s) declared that no grants were involved in supporting this work.

**Copyright:** © 2018 Matarese V and Shashok K. This is an open access article distributed under the terms of the [Creative Commons Attribution Licence](#), which permits unrestricted use, distribution, and reproduction in any medium, provided the original work is properly cited. Data associated with the article are available under the terms of the [Creative Commons Zero "No rights reserved" data waiver](#) (CC0 1.0 Public domain dedication).

**How to cite this article:** Matarese V and Shashok K. **Improving the biomedical research literature: insights from authors' editors can help journal editors define and refine their core competencies [version 2; referees: 2 approved]** *F1000Research* 2018, 7:109 (doi: [10.12688/f1000research.13760.2](https://doi.org/10.12688/f1000research.13760.2))

**First published:** 25 Jan 2018, 7:109 (doi: [10.12688/f1000research.13760.1](https://doi.org/10.12688/f1000research.13760.1))



for hospitalized patients with T2D with mild to moderate glycaemic control treated without injectable therapies at home. Mounting evidence from randomized controlled trials and this real-world study indicate the efficacy and safety of different DPP4i in the management of hospitalized patients with T2D.

**Author Contributions:** L.M.P.-B., conceptualization, methodology, formal analysis, data curation, writing—original draft preparation, writing—review & editing, supervision; J.J.G.-D., conceptualization, methodology, writing—review & editing, supervision; M.M.-G., M.D.L.-C., R.G.-M. and F.C.-C., formal analysis, data curation, writing—original draft preparation, writing—review & editing; E.d.T.-G., M.J.-N., M.R.B.-L. and R.G.-H., writing—original draft preparation, writing—review & editing, supervision. All authors approved the final version of the paper.

**Funding:** This work was funded by grants from Internal Medicine Department, cofounded by the Fondo Europeo de Desarrollo Regional-FEDER (“Centros de Investigación En Red” (CIBER, CB06/03/0018) and the Spanish Society of Cardiology (Proyectos de Investigación en Servicios de Salud de Cardiología de la Sociedad Española de Cardiología).

**Acknowledgments:** We thank Claire Conrad for her help with the final English-language version.

**Conflicts of Interest:** R.G.-H. has received consulting fees and honoraria for membership of advisory boards from Boehringer Ingelheim, Eli Lilly, Novo Nordisk, Sanofi and Janssen. None of these financial contributions are related to the manuscript. No other potential conflicts of interest relevant to this article were reported.

## References

- Gregori, D.; Pagano, E.; Rosato, R.; Bo, S.; Zigon, G.; Merletti, F. Evaluating hospital costs in type 2 diabetes care: Does the choice of the model matter? *Curr. Med. Res. Opin.* **2006**, *22*, 1965–1971. [[CrossRef](#)] [[PubMed](#)]
- Pérez-Belmonte, L.M.; Lara-Rojas, C.M.; López-Carmona, M.D.; Guijarro-Merino, R.; Bernal-López, M.R.; Gómez-Huelgas, R. National trends in heart failure hospitalization rates in patients with diabetes mellitus: 1997–2010. *Rev. Esp. Cardiol.* **2018**, *71*, 408–410. [[CrossRef](#)] [[PubMed](#)]
- Lara-Rojas, C.M.; Pérez-Belmonte, L.M.; López-Carmona, M.D.; Guijarro-Merino, R.; Bernal-López, M.R.; Gómez-Huelgas, R. National trends in diabetes mellitus hospitalization in Spain 1997–2010: Analysis of over 5.4 millions of admissions. *Eur. J. Intern. Med.* **2018**, in press. [[CrossRef](#)] [[PubMed](#)]
- Sarwar, N.; Gao, P.; Seshasai, S.R.; Gobin, R.; Kaptoge, S.; Di Angelantonio, E.; Ingelsson, E.; Lawlor, D.A.; Selvin, E.; Stampfer, M.; et al. Diabetes mellitus, fasting blood glucose concentration, and risk of vascular disease: A collaborative meta-analysis of 102 prospective studies. *Lancet* **2010**, *375*, 2215–2222. [[CrossRef](#)] [[PubMed](#)]
- Moss, S.E.; Klein, R.; Klein, B.E. Risk factors for hospitalization in people with diabetes. *Arch. Intern. Med.* **1999**, *159*, 2053–2057. [[CrossRef](#)] [[PubMed](#)]
- Umpierrez, G.E.; Hellman, R.; Korytkowski, M.T.; Kosiborod, M.; Maynard, G.A.; Montori, V.M.; Seley, J.J.; Van den Berghe, G. Management of hyperglycemia in hospitalized patients in non-critical care setting: An endocrine society clinical practice guideline. *J. Clin. Endocrinol. Metab.* **2012**, *97*, 16–38. [[CrossRef](#)] [[PubMed](#)]
- Inzucchi, S.E. Management of hyperglycemia in the hospital setting. *N. Engl. J. Med.* **2006**, *355*, 1903–1911. [[CrossRef](#)] [[PubMed](#)]
- American Diabetes Association. Diabetes Care in the Hospital: Standards of Medical Care in Diabetes—2018. *Diabetes Care* **2018**, *41*, S144–S151. [[CrossRef](#)] [[PubMed](#)]
- Umpierrez, G.E.; Smiley, D.; Zisman, A.; Prieto, L.M.; Palacio, A.; Ceron, M.; Puig, A.; Mejia, R. Randomized study of basal-bolus insulin therapy in the inpatient management of patients with type 2 diabetes (RABBIT 2 trial). *Diabetes Care* **2007**, *30*, 2181–2186. [[CrossRef](#)] [[PubMed](#)]
- Umpierrez, G.E.; Smiley, D.; Jacobs, S.; Peng, L.; Temponi, A.; Mulligan, P.; Umpierrez, D.; Newton, C.; Olson, D.; Rizzo, M. Randomized study of basal-bolus insulin therapy in the inpatient management of patients with type 2 diabetes undergoing general surgery (RABBIT 2 surgery). *Diabetes Care* **2011**, *34*, 256–261. [[CrossRef](#)] [[PubMed](#)]
- Boucai, L.; Southern, W.N.; Zonszein, J. Hypoglycemia-associated mortality is not drug-associated but linked to comorbidities. *Am. J. Med.* **2011**, *124*, 1028–1035. [[CrossRef](#)] [[PubMed](#)]
- Gómez-Huelgas, R.; López-Carmona, M.D.; Jansen-Chaparro, S.; Sobrino, B.; Chaves, M.; Martín-Gallardo, P.; García-Fernández, C.; Bernal-López, M.R. Assessment of an educational intervention in the management of non-critical inpatient glycemic control. *Acta Diabetol.* **2014**, *51*, 377–383. [[CrossRef](#)] [[PubMed](#)]

multivariable analysis of the factors involved in test failure is consistent with the literature and so is a strong indicator of the validity of our results. While we demonstrated that heparin could not be held solely responsible for non-reportable results in those patients, we were not able to assess the impact of other treatments on cfDNA testing. It is theoretically possible that other treatment commonly used in patients with auto-immune disorders (such as steroids for example) negatively impacted cfDNA testing as well. Hui et al. reported increased fetal fraction in a patient with a history of severe autoimmune thrombocytopenia following the introduction of an immunosuppressive treatment by steroids [31]. Such reports raise the question of the impact of treatment on cfDNA testing and further studies should focus on understanding this complex relationship.

## Conclusion

Our study ruled out the hypothesis that heparin treatment has an impact on cfDNA screening and found that autoimmune diseases are associated with test failure. A limitation of our work lies within its retrospective nature and further studies with larger samples and prospective design should help improve our knowledge of the factors involved in non-reportable test result.

## Authors' contributions

Conceptualization: YD, AB. Validation: JMC, AL. Formal analysis: JJ, AL. Investigation: SG, AD, PK, LL. Data curation: PK, LL, AD. Original draft: YD, SG, AB. Review: all authors. Visualization: JMC. Supervision: AB, JMC. All authors revised the manuscript for important intellectual content. All authors reviewed and agree to be accountable for all aspects of the work. All authors read and approved the final manuscript.

## Author details

<sup>1</sup> Service de Gynécologie-Obstétrique, AP-HP, Hôpital Antoine Bécclère, Université Paris Sud, 154 rue de la Porte de Trivaux, 92140 Clamart, France. <sup>2</sup> Human Genetics Department, Laboratoire CERBA, Saint-Ouen l'Aumône, France. <sup>3</sup> Department of Obstetrics and Gynecology, University Hospital Brugmann, Université Libre de Bruxelles, Brussels, Belgium.

## Acknowledgements

We sincerely thank D. Marsh for his advice on language editing.

## Competing interests

JMC, PK and LL are employees of Laboratoire CERBA, in which they are also shareholders. The remaining authors have no competing interests to disclose.

## Availability of data and materials

Not applicable.

## Consent for publication

Not applicable.

## Ethics approval and consent to participate

In line with French regulations regarding prenatal diagnosis, written informed consent was obtained from all patients as the result was used for clinical management. Laboratoire CERBA is authorized by the Regional Health Agency to perform these screening tests. Regarding patients who participated in the DEPOSA study, our local institutional review board approved this study (CPP No. 14-054) (ClinicalTrials.gov number: NCT02424474).

## Funding

None.

## Publisher's Note

Springer Nature remains neutral with regard to jurisdictional claims in published maps and institutional affiliations.

Received: 17 September 2018 Accepted: 20 November 2018

Published online: 03 December 2018

## References

- Lo YM, Corbetta N, Chamberlain PF, Rai V, Sargent IL, Redman CW, et al. Presence of fetal DNA in maternal plasma and serum. *Lancet Lond Engl*. 1997;350(9076):485–7.
- Nicolaides KH. Screening for fetal aneuploidies at 11 to 13 weeks. *Prenat Diagn*. 2011;31(1):7–15.
- Costa JM, Letourneau A, Favre R, Bidat L, Belaisch-Allart J, Jouannic J-M, et al. Cell-free fetal DNA versus maternal serum screening for trisomy 21 in pregnant women with and without assisted reproduction technology: a prospective interventional study. *Genet Med*. 2018. <https://doi.org/10.1038/gim.2018.4>.
- Norton ME, Baer RJ, Wapner RJ, Kuppermann M, Jelliffe-Pawlowski LL, Currier RJ. Cell-free DNA vs sequential screening for the detection of fetal chromosomal abnormalities. *Am J Obstet Gynecol*. 2016;214(6):727.e1–6.
- Bianchi DW, Parker RL, Wentworth J, Madankumar R, Saffer C, Das AF, et al. DNA sequencing versus standard prenatal aneuploidy screening. *N Engl J Med*. 2014;370(9):799–808.
- Porreco RP, Garite TJ, Maurel K, Marusiak B, Obstetrix Collaborative Research Network, Ehrich M, et al. Noninvasive prenatal screening for fetal trisomies 21, 18, 13 and the common sex chromosome aneuploidies from maternal blood using massively parallel genomic sequencing of DNA. *Am J Obstet Gynecol*. 2014;211(4):365.e1–12.
- Gil MM, Accurti V, Santacruz B, Plana MN, Nicolaides KH. Analysis of cell-free DNA in maternal blood in screening for aneuploidies: updated meta-analysis. *Ultrasound Obstet Gynecol Off J Int Soc Ultrasound Obstet Gynecol*. 2017;50(3):302–14.
- Canick JA, Palomaki GE, Kloza EM, Lambert-Messerlian GM, Haddow JE. The impact of maternal plasma DNA fetal fraction on next generation sequencing tests for common fetal aneuploidies. *Prenat Diagn*. 2013;33(7):667–74.
- Sparks AB, Struble CA, Wang ET, Song K, Oliphant A. Noninvasive prenatal detection and selective analysis of cell-free DNA obtained from maternal blood: evaluation for trisomy 21 and trisomy 18. *Am J Obstet Gynecol*. 2012;206(4):319.e1–9.
- Palomaki GE, Deciu C, Kloza EM, Lambert-Messerlian GM, Haddow JE, Neveux LM, et al. DNA sequencing of maternal plasma reliably identifies trisomy 18 and trisomy 13 as well as Down syndrome: an international collaborative study. *Genet Med Off J Am Coll Med Genet*. 2012;14(3):296–305.
- Revello R, Sarno L, Ispas A, Akolekar R, Nicolaides KH. Screening for trisomies by cell-free DNA testing of maternal blood: consequences of a failed result. *Ultrasound Obstet Gynecol Off J Int Soc Ultrasound Obstet Gynecol*. 2016;47(6):698–704.
- Nicolaides KH, Syngelaki A, Gil M, Atanasova V, Markova D. Validation of targeted sequencing of single-nucleotide polymorphisms for non-invasive prenatal detection of aneuploidy of chromosomes 13, 18, 21, X, and Y. *Prenat Diagn*. 2013;33(6):575–9.
- Fan HC, Quake SR. Sensitivity of noninvasive prenatal detection of fetal aneuploidy from maternal plasma using shotgun sequencing is limited only by counting statistics. *PLoS ONE*. 2010;5(5):e10439.
- Ma G-C, Wu W-J, Lee M-H, Lin Y-S, Chen M. The use of low molecular weight heparin reduced the fetal fraction and rendered the cell-free DNA testing for trisomy 21 false negative: false negative cfDNA for fetal trisomy 21 due to heparin use. *Ultrasound Obstet Gynecol*. 2017. <https://doi.org/10.1002/uog.17473>.
- Grömminger S, Erkan S, Schöck U, Stangier K, Bonnet J, Schloo R, et al. The influence of low molecular weight heparin medication on plasma DNA in pregnant women. *Prenat Diagn*. 2015;35(11):1155–7.



Specific topics within the context of implementation include which reimbursement and incentive structures work best to facilitate implementation, what training methods are most successful in creating effective multidisciplinary teams, and how can organizational culture shift to support innovation.

## Conclusion

The policies and processes for addressing polypharmacy vary widely in the EU, and many countries in the EU are not formally addressing polypharmacy management. These case studies provide examples of initiatives that can be used by countries in the process of developing new polypharmacy management activities, as well as to those looking to scale up existing programs, and highlight the importance of change management and theory based implementation strategies [30].

## Supporting information

**S1 File. Data collection tools.**  
(DOCX)

## Acknowledgments

We would like to thank those who generously participated in the interviews and focus groups for sharing their time and expertise. We would also like to thank the following members of the SIMPATHY consortium for their contributions: Mauro Cataldi, Federico II University Hospital (writing—review & editing related to the Campania Case Study); Antonio Cittadini, Federico II University Hospital, Naples, Italy (formal analysis, writing—review & editing related to the Italian Case Study); Isabel V. Figueiredo, University of Coimbra, Coimbra, Portugal (resources, project administration, methodology); Astrid Forsström, Uppsala University Hospital, Uppsala, Sweden (resources, supervision and writing—review & editing related to the Swedish Case Study); Mary Geitona, University of Peloponnese, Korinthos, Greece (conceptualization, funding acquisition, supervision and writing—review & editing related to the Greek Case Study); Simon Hurding, Scottish Government, Edinburgh, Scotland (conceptualization, funding acquisition, supervision and writing—review & editing related to the Scottish Case Study); Moira Kinnear, Scottish Government, Edinburgh, Scotland (conceptualization, funding acquisition, supervision and writing—review & editing related to the Scottish Case Study); Nils Michael, Scottish Government, Edinburgh, Scotland (conceptualization and funding acquisition); Michael Scott, Regional Medicines Optimisation Innovation Centre(MOIC) Northern Health and Social Care Trust, Antrim, Northern Ireland (conceptualization, funding acquisition, supervision); Neil Stewart, Kite Innovations Europe, Huddersfield, UK (funding acquisition, project supervision); Theodore Vontetsianos, eHealth Innovation Unit, 1st Regional Health Authority of Attica, Athens, Greece (resources, supervision, writing—review & editing related to the Greek case study), Martin Wilson, Scottish Government, Edinburgh, Scotland (conceptualization, funding acquisition, supervision and writing—review & editing related to the Scottish Case Study).

## Author Contributions

**Conceptualization:** Albert Alonso, Katie MacLure, Derek Stewart, Alpana Mair, Margarida Castel-Branco, Carles Codina, Fernando Fernandez-Llimos, Glenda Fleming, Ulrika Gillespie, Cathy Harrison, Maddalena Illario, Przemyslaw Kardas, Birgitt Wiese.

**Formal analysis:** Jennifer McIntosh, Albert Alonso, Thomas Kempen, Margarida Castel-Branco, Fernando Fernandez-Llimos, Dimitra Gennimata, Ulrika Gillespie, Ulrike Junius-Walker, Christos F. Kampolis, Pawel Lewek, Enrica Menditto, Claire Scullin.

**Funding acquisition:** Albert Alonso, Alpana Mair, Cathy Harrison, Maddalena Illario, Przemyslaw Kardas, Birgitt Wiese.

**Investigation:** Jennifer McIntosh, Thomas Kempen, Margarida Castel-Branco, Glenda Fleming, Dimitra Gennimata, Ulrika Gillespie, Ulrike Junius-Walker, Christos F. Kampolis, Przemyslaw Kardas, Pawel Lewek, Enrica Menditto, Claire Scullin.

**Methodology:** Jennifer McIntosh, Albert Alonso, Katie MacLure, Derek Stewart, Thomas Kempen, Carles Codina, Fernando Fernandez-Llimos, Dimitra Gennimata, Ulrike Junius-Walker, Christos F. Kampolis, Pawel Lewek, Enrica Menditto, Claire Scullin, Birgitt Wiese.

**Project administration:** Thomas Kempen, Cathy Harrison, João Malva.

**Resources:** João Malva.

**Supervision:** Jennifer McIntosh, Katie MacLure, Derek Stewart, Carles Codina, Fernando Fernandez-Llimos, Ulrika Gillespie, Cathy Harrison, Maddalena Illario, Ulrike Junius-Walker, João Malva, Birgitt Wiese.

**Writing – original draft:** Jennifer McIntosh, Albert Alonso, Katie MacLure, Derek Stewart.

**Writing – review & editing:** Jennifer McIntosh, Albert Alonso, Katie MacLure, Derek Stewart, Thomas Kempen, Alpana Mair, Margarida Castel-Branco, Carles Codina, Fernando Fernandez-Llimos, Glenda Fleming, Dimitra Gennimata, Ulrika Gillespie, Cathy Harrison, Maddalena Illario, Ulrike Junius-Walker, Christos F. Kampolis, Przemyslaw Kardas, Pawel Lewek, João Malva, Enrica Menditto, Claire Scullin, Birgitt Wiese.

## References

1. Benziger CP, Roth GA, Moran AE. The Global Burden of Disease Study and the Preventable Burden of NCD. *Glob Heart*. 2016; 11(4):393–7. <https://doi.org/10.1016/j.gheart.2016.10.024> PMID: 27938824
2. OECD/EU. Health at a Glance: Europe 2016: State of Health in the EU Cycle. Paris: OECD Publishing; 2016.
3. World Health Organization. Multimorbidity: Technical Series on Safer Primary Care. Geneva; 2016.
4. Zulman DM, PalChee C, Wagner TH, Yoon J, Cohen DM, Holmes TH, et al. Multimorbidity and health-care utilisation among high-cost patients in the US Veterans Affairs Health Care System. *BMJ Open*. 2015; 5(4):e007771. <https://doi.org/10.1136/bmjopen-2015-007771> PMID: 25882486
5. van den Bussche H, Schon G, Kolonko T, Hansen H, Wegscheider K, Glaeske G, et al. Patterns of ambulatory medical care utilization in elderly patients with special reference to chronic diseases and multimorbidity—results from a claims data based observational study in Germany. *BMC Geriatr*. 2011; 11:54. <https://doi.org/10.1186/1471-2318-11-54> PMID: 21914191
6. Vogeli C, Shields AE, Lee TA, Gibson TB, Marder WD, Weiss KB, et al. Multiple chronic conditions: prevalence, health consequences, and implications for quality, care management, and costs. *J Gen Intern Med*. 2007; 22 Suppl 3:391–5.
7. Fortin M, Lapointe L, Hudon C, Vanasse A, Ntutu AL, Maltais D. Multimorbidity and quality of life in primary care: a systematic review. *Health Qual Life Outcomes*. 2004; 2:51. <https://doi.org/10.1186/1477-7525-2-51> PMID: 15380021
8. Menotti A, Mulder I, Nissinen A, Giampaoli S, Feskens EJ, Kromhout D. Prevalence of morbidity and multimorbidity in elderly male populations and their impact on 10-year all-cause mortality: The FINE study (Finland, Italy, Netherlands, Elderly). *J Clin Epidemiol*. 2001; 54(7):680–6. PMID: 11438408
9. Barnett K, Mercer SW, Norbury M, Watt G, Wyke S, Guthrie B. Epidemiology of multimorbidity and implications for health care, research, and medical education: a cross-sectional study. *Lancet*. 2012; 380(9836):37–43. [https://doi.org/10.1016/S0140-6736\(12\)60240-2](https://doi.org/10.1016/S0140-6736(12)60240-2) PMID: 22579043



postmitotic nuclei are located in a central position within the cell (Baluška et al., 2001). In addition, no mitotic figures have been observed along the root zone; lateral root primordia initiation was observed between 20–25 mm from RCJ (Alarcón et al., 2016). In *Arabidopsis*, the average distance to the earliest mitosis in the pericycle is 3194 µm and the first mitosis has been observed at 2205 µm from the root tip (Dubrovsky et al., 2001). In maize root, only at 20–30 mm from RCJ, some pericycle opposite xylem cells showed condensate cytoplasm, indicating they are re-entering the cell cycle (Alarcón et al., 2016). These differences might be caused by the greater elongation root rate in maize which grows 80–90 mm/day, whereas *Arabidopsis* elongates only 10 mm/day (Dubrovsky et al., 2001).

It has been shown using a tissue-specific quantitative microscopic analysis that some cells of cortex and epidermis were in the first endocycle (DNA contents between 4C and 8C) at their start of elongation. Moreover, nuclei of metaxylem elements in the transition zone accomplished one or two endocycles reaching 32C at their onset of rapid elongation (Baluška, 1987, 1990; Baluška and Kubica, 1984; Baluška et al., 1995). Recently, endoreduplication has been described to occur in plants before cells initiate differentiation (De Veylder et al., 2007). However, we did not observe a relevant number of nuclei with ploidy level higher than 4n. Moreover, if endoreduplication was a common process in maize root tip, we would expect hyperploidy to increase as we analysed zones further away from RCJ. However, hyperploidy not only did not increase in zones elongation zones, but decreased (Table 1).

It has been reported that pericycle cells remain in G1-phase until they re-enter the cell cycle (Vanneste et al., 2007). However, pericycle cells represent just a small fraction of the total amount of cells that form the root tips; epidermal and cortex cells being the most abundant types of cell in root apex. Then, if about 70% of total cells abandon meristem in G2-phase, most of the epidermal and cortex cells must be in G2 when they leave the meristem. It is assumed that epidermal and cortex cell elongation control root longitudinal growth (Alarcón et al., 2014b). Therefore, cells involved in the differentiation process that results in root elongation should be in G2 phase.

### Effect of temperature on cell cycle

In our experimental conditions, optimal temperature for maize root elongation was estimated in 30°C, and root elongation decreased by 50% when roots were grown at 20°C. The difference in the several cell cycle phases between roots elongated at 30 and 20°C is presented in Table 1.

The most relevant result was that the percentage of cells in G0/G1 at 20°C diminished by 50% compared to roots grown at 30°C in EZ and DZ. The peak corresponding to G0/G1-phases practically disappeared in flow cytometry profiles at 20°C from the segment located in TZ (3 mm away from RCJ). This indicates that cells leaving meristem in G0/G1- or S-phases continue to cycle until they reach G2-phase, where they stop. In addition, we observed that these changes in transition zone are quicker at 30°C. The changes in percentage in G0/G1 reached a stable value that did not change along the TZ, but this fact occurred in EZ when roots were grown at 20°C. In the same way, the strongest changes in S- and G2/M-phases at 30°C occurred in TZ, but they took place in the zone EZ at 20°C. It is well known that cell cycle time increased at suboptimal temperatures (Giménez-Martín et al., 1977). Therefore, cells at 30°C presented a shorter cell cycle time, as they go through the cell cycle phases more rapidly.

In summary, data reported in this work indicate that cells controlling root elongation in maize abandon meristem in G2-phase. When cells leave meristem in G1- or S-phases, they continue the cycle until they reach G2-phase, and then they stop. These results reveal the role of cell cycle on the balance between the cell proliferation and differentiation processes which occur in the meristem and the elongation zone of the root.

## MATERIAL AND METHODS

### Plant material and growth conditions

Seeds of *Zea mays* L. cv DK 626 were washed three times and soaked in distilled water with aeration at 30°C. After 24 h, the seedlings, with radicles of about 1 mm length, were placed in plastic boxes on filter paper moist with distilled water. Seed were also covered with filter paper and grown in darkness. They were kept vertically for 24 h until the roots reached a length of 30±5 mm. Discs with 10 selected seedlings of uniform root length were placed in bottles containing 1.5 l of growth medium composed of a solution of 1 mM HEPES (2-hydroxyethylpiperazine-2-ethanesulfonic acid) CaCl<sub>2</sub> 1 mM and KCl 10 mM buffered growth solution, and grown at 30°C in darkness. The growth medium was aerated by an aquarium pump. After an acclimation period of 24 h, primary roots were 70–80 mm long and then roots were grown at 30°C or 20°C. Roots elongated 84.75±4.53 and 42.98±2.40 mm/day (mean±s.d.) at 30°C and 20°C, respectively. The next day, roots of 70–80 mm reached 150–160 mm (30°C) or 115–120 mm (20°C).

### Flow cytometry estimation of cell cycle progression

Primary roots grown at 30 and 20°C were dissected in several segments according to the different root zones of the root. The root cap was eliminated by removing most apical 0.5 mm and the following segments were cut: 0–1.5, 1.5–3, 3–6, 6–12 and 12–20 mm, and kept in different tubes. The segment was chopped with a razor blade for 30–60 s in a watch glass containing around 2 ml of extraction buffer [Tris-HCl 0.2 M, MgCl<sub>2</sub>·6H<sub>2</sub>O 4 mM, EDTA-Na<sub>2</sub>·2H<sub>2</sub>O 2 mM, NaCl 86 mM, Metabisulfite 10 mM, 1% PVP 10, 1% (v/v) Triton X-100 pH 7.5]. The resulting extract was passed through a 30 µm filter and centrifuged at 1500 rpm, 5 min. Then, 1 ml of staining buffer (50 µl of RNaseA 20 mg/ml, 50 µl of Propidium Iodide 0.05% and 900 µl of PBS) was added. Samples were incubated at 37°C in the dark for 30 min. Flow cytometry analysis was performed using a FC500 flow cytometer (BeckmanCoulter, Hialeah, FL, USA). At least 10,000 single nuclei (discarding doublets and aggregates) were acquired in each sample. Experiments were performed in triplicate.

### Acknowledgements

We thank Alberto Álvarez-Barrientos and Pilar Torralvo from the STAB at the University of Extremadura for their assistance in performing flow cytometry proceedings. We also thank Joao Loureiro for the critical reading of the manuscript and Alberto Salguero for reviewing our text in English.

### Competing interests

The authors declare no competing or financial interests.

### Author contributions

Conceptualization: M.V.A., J.S.; Methodology: M.V.A., J.S.; Formal analysis: M.V.A., J.S.; Investigation: M.V.A., J.S.; Writing - original draft: J.S.; Funding acquisition: M.V.A., J.S.

### Funding

This work was supported by Consejería de Educación y Empleo, Junta de Extremadura (research groups GR15112 and GR15158, projects CCESAgros and BBB116) and European Regional Development Fund.

### References

Alarcón, M. V., Lloret, P. G. and Salguero, J. (2014a). The development of the maize root system: role of auxin and ethylene. In *Root Engineering, Soil Biology*, Vol. 40 (ed. A. Morte and A. Varga), pp. 75–103. Berlin Heidelberg: Springer-Verlag.

## Acknowledgements

This work was supported by the Spanish Ministry of Science and Innovation (grant number BFU2011-23049, co-funded by the European Regional Development Fund; Subprograma Ayudas FPI-MICINN, BES-2012-052293), the Medical Research Council (grant number MR/P006639/1), the Valencia Regional Government (ACOMP2010/199 and PROMETEO/2011/086), and the University of Sussex internal research development fund. The authors declare no competing financial interests.

We thank Karel Svoboda for sharing designs, advice and equipment, Leopoldo Petreanu for sharing designs, Rasmus Petersen for sharing code for behaviour control and for comments on an earlier version of the manuscript, and Elena Giusto for technical help and for the drawings in *Figure 1*.

## Additional information

### Funding

| Funder                                  | Grant reference number             | Author                               |
|-----------------------------------------|------------------------------------|--------------------------------------|
| Ministerio de Economía y Competitividad | BFU2011-23049 BES-2012-052293      | Miguel Maravall                      |
| Generalitat Valenciana                  | ACOMP2010/199<br>PROMETEO/2011/086 | Miguel Maravall                      |
| Medical Research Council                | MR/P006639/1                       | Miguel Maravall                      |
| University of Sussex                    |                                    | Malamati Bitzidou<br>Miguel Maravall |

The funders had no role in study design, data collection and interpretation, or the decision to submit the work for publication.

### Author contributions

MRB, Conceptualization, Data curation, Software, Formal analysis, Validation, Investigation, Visualization, Methodology, Writing—original draft, Writing—review and editing; MB, Software, Formal analysis, Investigation, Methodology, Writing—review and editing; AP, LSB, Investigation, Methodology, Writing—review and editing; LK, STA, CDS, Investigation, Writing—review and editing; MM, Conceptualization, Formal analysis, Supervision, Funding acquisition, Validation, Investigation, Writing—original draft, Project administration, Writing—review and editing

### Author ORCIDs

Michael R Bale, <http://orcid.org/0000-0002-5325-1992>

Malamati Bitzidou, <http://orcid.org/0000-0002-3726-9543>

Leonie S Brebner, <http://orcid.org/0000-0002-4540-2826>

Caitlin D Stevenson, <http://orcid.org/0000-0003-4444-6402>

Miguel Maravall, <http://orcid.org/0000-0002-8869-7206>

### Ethics

Human subjects: Human experiments were conducted and underwent ethical review at the University of Sussex. Experiments were approved through the review process in the School of Life Sciences and were given approval identifiers ER/LK250/1, ER/CS502/1, ER/SA533/2. All participants gave informed consent. Participants were provided with an information sheet stating the possibility that the research could be published.

Animal experimentation: All procedures were carried out in accordance with institutional, national (Spain and United Kingdom) and international (European Union directive 2010/63/EU) regulations for the care and use of animals in research. All procedures received prior approval by the relevant institutional ethical committee (Instituto de Neurociencias, CSIC; University of Sussex AWERB) and were covered by the appropriate personal and project licences.



of Mif KD on mitochondrial division and mitochondrial Drp1 oligomer density. Fig. S6 shows that a second splice variant of Drp1 displays independent punctae, but that MifD51 does not. Video 1 shows two independent Drp1 punctae stably associated with ER (one goes out of the focal plane briefly). Videos 2 and 3 show Drp1 punctae translocating to mitochondria (Video 2 does not have an ER marker; Video 3 has an ER marker). Videos 4 and 5 show Drp1 punctae translocating to mitochondria, followed by mitochondrial division, after ionomycin stimulation (Video 4 does not have an ER marker; Video 5 has an ER marker). Video 6 shows an independent GFP-Mif puncta stably on ER. Video 7 shows an independent GFP-Mif puncta transferring from ER to mitochondrion (Airyscan). Video 8 shows colocalization of GFP-Drp1 and mStrawberry-Mif on ER. Videos 9 and 10 show the change in independent Drp1 punctae after ionomycin treatment. In Video 9, the punctae increase, but in Video 10 (pretreated with latrunculin A) the punctae do not increase.

### Acknowledgments

We thank Mike Ryan for GFP-Fis1, Ayumu Sugiura for advice on organelle fractionation, Heidi McBride for PEX3-deficient cells, Maya Schuldiner for discussions on TA proteins, Anna Hatch for editing, and Peter Rocs for being receptive to anything.

Support was provided by National Institutes of Health GM069818, GM106000, and P20 GM113132 to H.N. Higgs, National Institutes of Health NS056244 and NS 087908 to S. Strack, and National Institutes of Health S10OD010330 to the Norris Cotton Cancer Center.

The authors declare no competing financial interests.

Author contributions: W.-K. Ji: conceptualization, methodology, investigation, formal analysis, writing. R. Chakrabarti: conceptualization, methodology, investigation, formal analysis. X. Fan and L. Schoenfeld: methodology, investigation, formal analysis. S. Strack: methodology, investigation. H.N. Higgs: conceptualization, project administration, writing, funding acquisition.

Submitted: 17 October 2016

Revised: 1 June 2017

Accepted: 18 September 2017

### References

- Aviram, N., T. Ast, E.A. Costa, E.C. Arakel, S.G. Chuartzman, C.H. Jan, S. Haßdenteufel, J. Dudek, M. Jung, S. Schorr, et al. 2016. The SND proteins constitute an alternative targeting route to the endoplasmic reticulum. *Nature*. 540:134–138. <https://doi.org/10.1038/nature20169>
- Bui, H.T., and J.M. Shaw. 2013. Dynamin assembly strategies and adaptor proteins in mitochondrial fission. *Curr. Biol.* 23:R891–R899. <https://doi.org/10.1016/j.cub.2013.08.040>
- Bustillo-Zabalbeitia, I., S. Montessuit, E. Raemy, G. Basañez, O. Terrones, and J.C. Martinou. 2014. Specific interaction with cardiolipin triggers functional activation of dynamin-related protein 1. *PLoS One*. 9:e102738. <https://doi.org/10.1371/journal.pone.0102738>
- Chang, C.R., and C. Blackstone. 2007. Drp1 phosphorylation and mitochondrial regulation. *EMBO Rep.* 8:1088–1089. <https://doi.org/10.1038/sj.embor.7401118>
- Chang, C.R., and C. Blackstone. 2010. Dynamic regulation of mitochondrial fission through modification of the dynamin-related protein Drp1. *Ann. N. Y. Acad. Sci.* 1201:34–39. <https://doi.org/10.1111/j.1749-6632.2010.05629.x>
- Chhabra, E.S., V. Ramabhadran, S.A. Gerber, and H.N. Higgs. 2009. INF2 is an endoplasmic reticulum-associated formin protein. *J. Cell Sci.* 122:1430–1440. <https://doi.org/10.1242/jcs.040691>
- Clayton, D.A., and G.S. Shadel. 2014. Isolation of mitochondria from tissue culture cells. *Cold Spring Harb. Protoc.* <https://doi.org/10.1101/pdb.prot080002>
- Cribbs, J.T., and S. Strack. 2007. Reversible phosphorylation of Drp1 by cyclic AMP-dependent protein kinase and calcineurin regulates mitochondrial fission and cell death. *EMBO Rep.* 8:939–944. <https://doi.org/10.1038/sj.embor.7401062>
- Csordás, G., P. Várnai, T. Golenár, S. Roy, G. Purkins, T.G. Schneider, T. Balla, and G. Hajnóczky. 2010. Imaging interorganelle contacts and local calcium dynamics at the ER-mitochondrial interface. *Mol. Cell.* 39:121–132. <https://doi.org/10.1016/j.molcel.2010.06.029>
- Denic, V., V. Dötsch, and I. Sinning. 2013. Endoplasmic reticulum targeting and insertion of tail-anchored membrane proteins by the GET pathway. *Cold Spring Harb. Perspect. Biol.* 5:a013334. <https://doi.org/10.1101/cshperspecta.013334>
- De Vos, K.J., V.J. Allan, A.J. Grierson, and M.P. Sheetz. 2005. Mitochondrial function and actin regulate dynamin-related protein 1-dependent mitochondrial fission. *Curr. Biol.* 15:678–683. <https://doi.org/10.1016/j.cub.2005.02.064>
- DuBoff, B., J. Götz, and M.B. Feany. 2012. Tau promotes neurodegeneration via DRP1 mislocalization in vivo. *Neuron*. 75:618–632. <https://doi.org/10.1016/j.neuron.2012.06.026>
- DuBoff, B., M. Feany, and J. Götz. 2013. Why size matters—Balancing mitochondrial dynamics in Alzheimer's disease. *Trends Neurosci.* 36:325–335. <https://doi.org/10.1016/j.tins.2013.03.002>
- Friedman, J.R., L.L. Lackner, M. West, J.R. DiBenedetto, J. Nunnari, and G.K. Voeltz. 2011. ER tubules mark sites of mitochondrial division. *Science*. 334:358–362. <https://doi.org/10.1126/science.1207385>
- Fröhlich, C., S. Grabiger, D. Schwefel, K. Faelber, E. Rosenbaum, J. Mears, O. Rocks, and O. Daumke. 2013. Structural insights into oligomerization and mitochondrial remodeling of dynamin 1-like protein. *EMBO J.* 32:1280–1292. <https://doi.org/10.1038/emboj.2013.74>
- Gandre-Babbe, S., and A.M. van der Bliek. 2008. The novel tail-anchored membrane protein Mif controls mitochondrial and peroxisomal fission in mammalian cells. *Mol. Biol. Cell.* 19:2402–2412. <https://doi.org/10.1091/mbc.E07-12-1287>
- Hatch, A.L., P.S. Gurel, and H.N. Higgs. 2014. Novel roles for actin in mitochondrial fission. *J. Cell Sci.* 127:4549–4560. <https://doi.org/10.1242/jcs.153791>
- Hatch, A.L., W.K. Ji, R.A. Merrill, S. Strack, and H.N. Higgs. 2016. Actin filaments as dynamic reservoirs for Drp1 recruitment. *Mol. Biol. Cell.* 27:3109–3121. <https://doi.org/10.1091/mbc.E16-03-0193>
- Horie, C., H. Suzuki, M. Sakaguchi, and K. Mihara. 2002. Characterization of signal that directs C-tail-anchored proteins to mammalian mitochondrial outer membrane. *Mol. Biol. Cell.* 13:1615–1625. <https://doi.org/10.1091/mbc.01-12-0570>
- Hung, V., S.S. Lam, N.D. Udeshi, T. Svinkina, G. Guzman, V.K. Mootha, S.A. Carr, and A.Y. Ting. 2017. Proteomic mapping of cytosol-facing outer mitochondrial and ER membranes in living human cells by proximity biotinylation. *eLife*. 6:e24463. <https://doi.org/10.7554/eLife.24463>
- Ji, W.K., A.L. Hatch, R.A. Merrill, S. Strack, and H.N. Higgs. 2015. Actin filaments target the oligomeric maturation of the dynamin GTPase Drp1 to mitochondrial fission sites. *eLife*. 4:e11553. <https://doi.org/10.7554/eLife.11553>
- Kobayashi, S., A. Tanaka, and Y. Fujiki. 2007. Fis1, DLP1, and Pex11p coordinately regulate peroxisome morphogenesis. *Exp. Cell Res.* 313:1675–1686. <https://doi.org/10.1016/j.yexcr.2007.02.028>
- Koch, J., and C. Brocard. 2012. PEX11 proteins attract Mif and human Fis1 to coordinate peroxisomal fission. *J. Cell Sci.* 125:3813–3826. <https://doi.org/10.1242/jcs.102178>
- Koch, A., Y. Yoon, N.A. Bonekamp, M.A. McNiven, and M. Schrader. 2005. A role for Fis1 in both mitochondrial and peroxisomal fission in mammalian cells. *Mol. Biol. Cell.* 16:5077–5086. <https://doi.org/10.1091/mbc.E05-02-0159>
- Korobova, F., V. Ramabhadran, and H.N. Higgs. 2013. An actin-dependent step in mitochondrial fission mediated by the ER-associated formin INF2. *Science*. 339:464–467. <https://doi.org/10.1126/science.1228360>
- Korobova, F., T.J. Gauvin, and H.N. Higgs. 2014. A role for myosin II in mammalian mitochondrial fission. *Curr. Biol.* 24:409–414. <https://doi.org/10.1016/j.cub.2013.12.032>
- Krumpe, K., I. Frumkin, Y. Herzig, N. Rimón, C. Özbilci, B. Brügger, D. Rapoport, and M. Schuldiner. 2012. Ergosterol content specifies targeting of tail-anchored proteins to mitochondrial outer membranes. *Mol. Biol. Cell.* 23:3927–3935. <https://doi.org/10.1091/mbc.E11-12-0994>
- Labbé, K., A. Murley, and J. Nunnari. 2014. Determinants and functions of mitochondrial behavior. *Annu. Rev. Cell Dev. Biol.* 30:357–391. <https://doi.org/10.1146/annurev-cellbio-101011-155756>
